# Supplementary material for: Environmental Assessment of Hydrothermal Treatment of Wet Bio-Residues from Forest-Based and Agro-Industries into Intermediate Bioenergy Carriers
Source: MDPI journal article supplement (doi:10.3390/en17030560), 2024-01-24
Supplement: s1 [file s1]

### **Supplementary Material C**

This appendix reports the data visualization using histograms of the comparison of the LCIA results for the biogenic residue treatment in F-CUBED Production System, Reference Case and Electricity Country Mix.

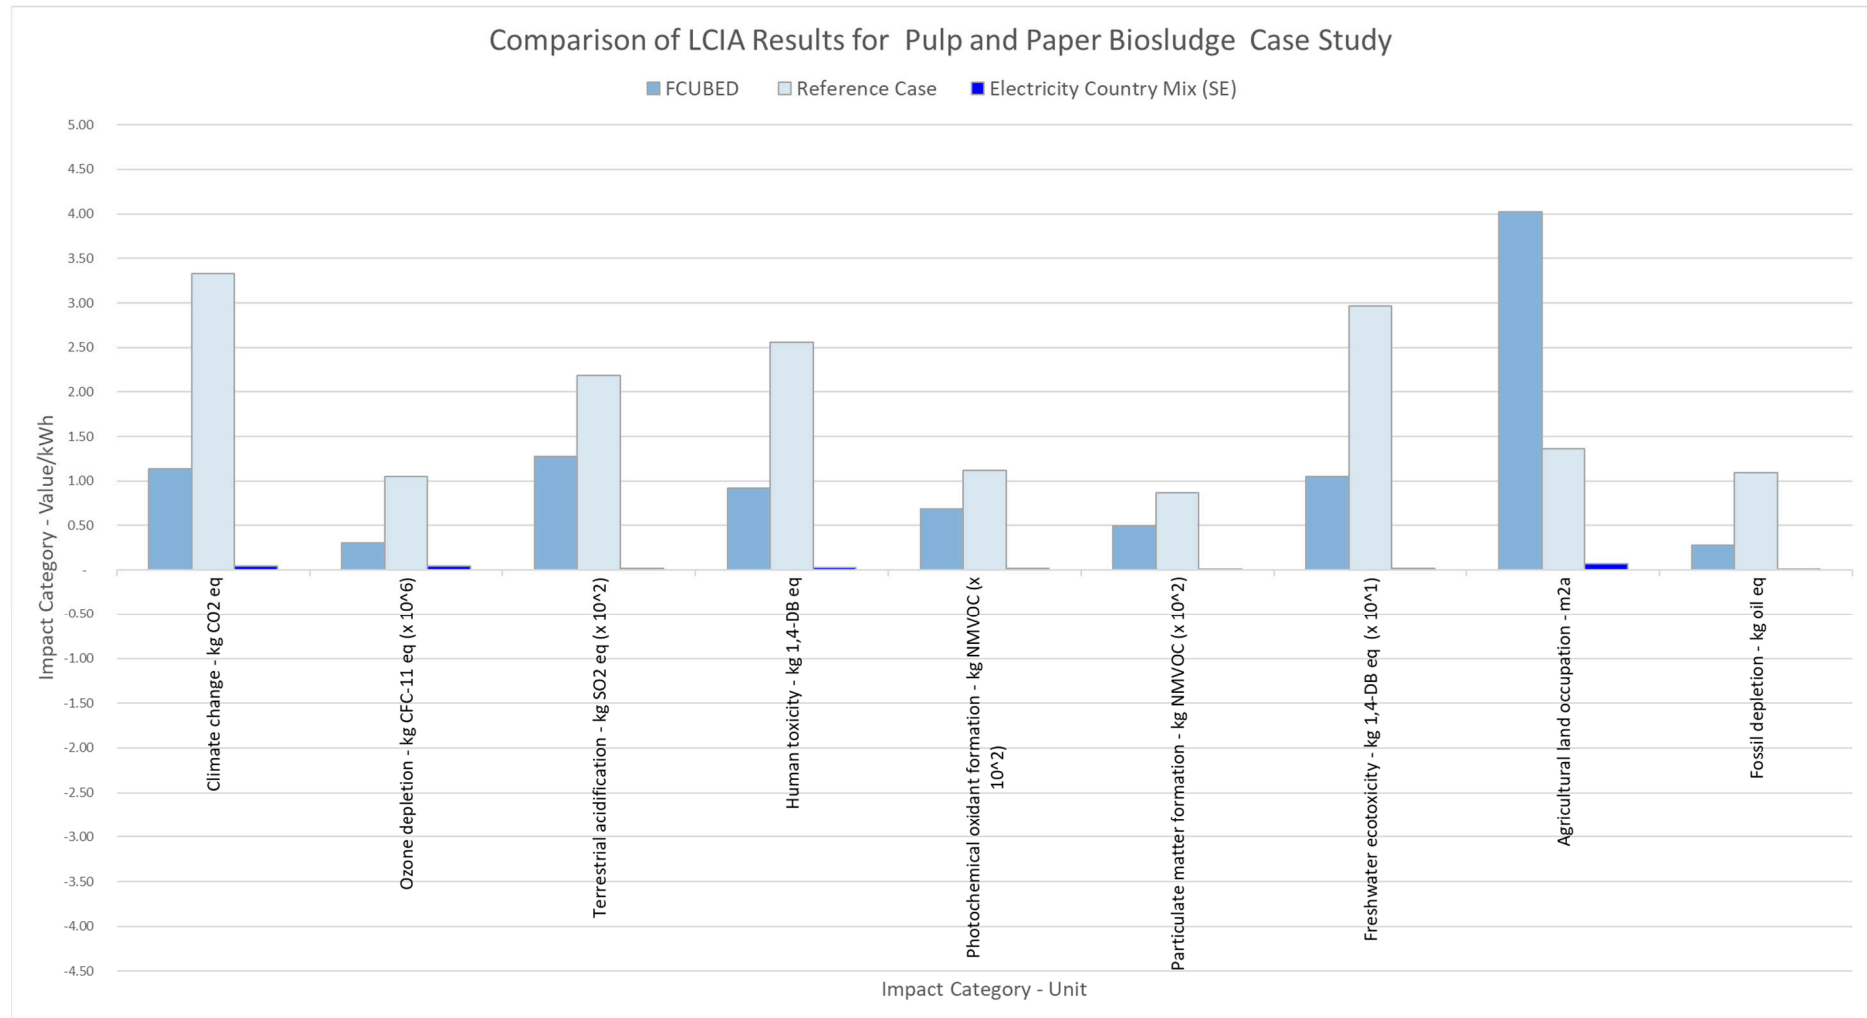

**Figure S10.** Comparison of LCIA results for pulp and paper bio-sludge case studies: F-CUBED production system, reference case, electricity country mix (Sweden).

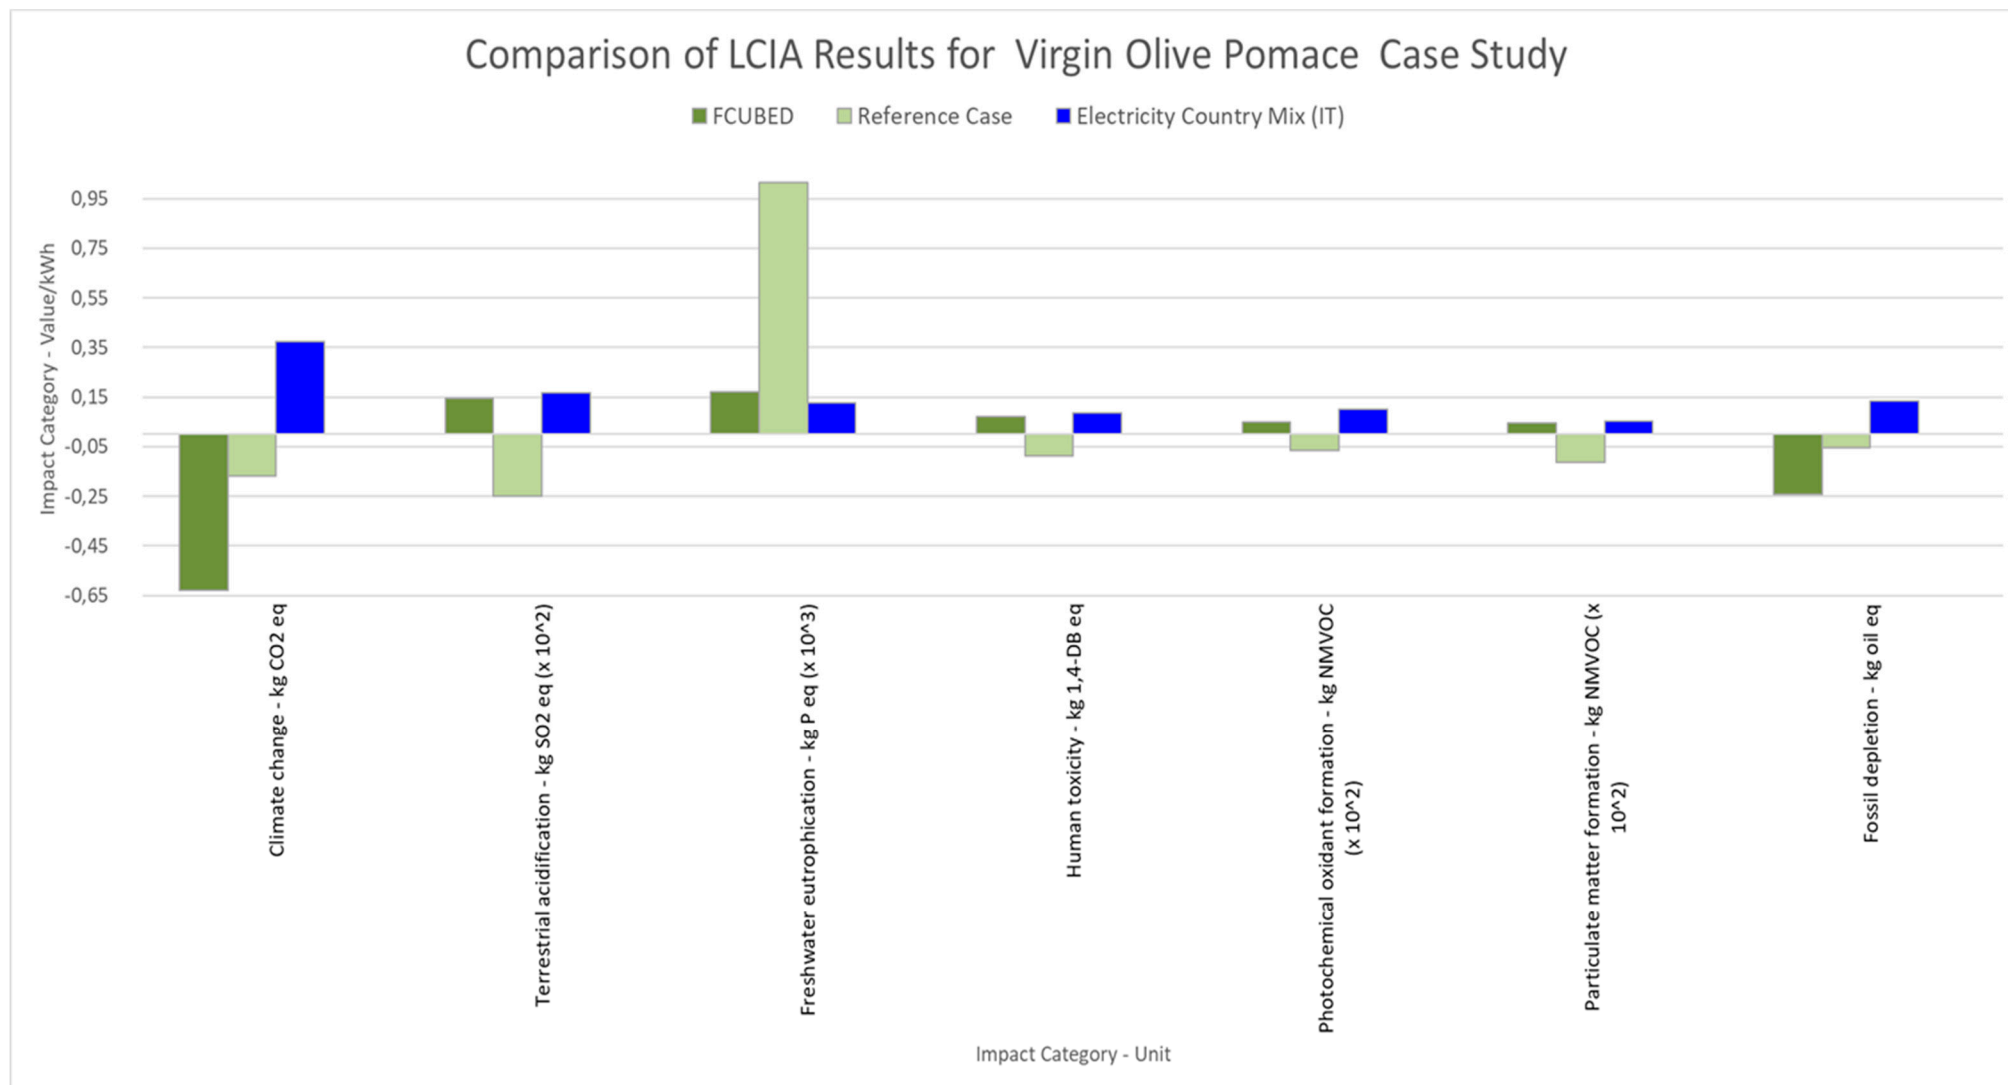

**Figure S11.** Comparison of LCIA results for olive pomace case studies: F-CUBED production system, reference case, electricity country mix (Italy).

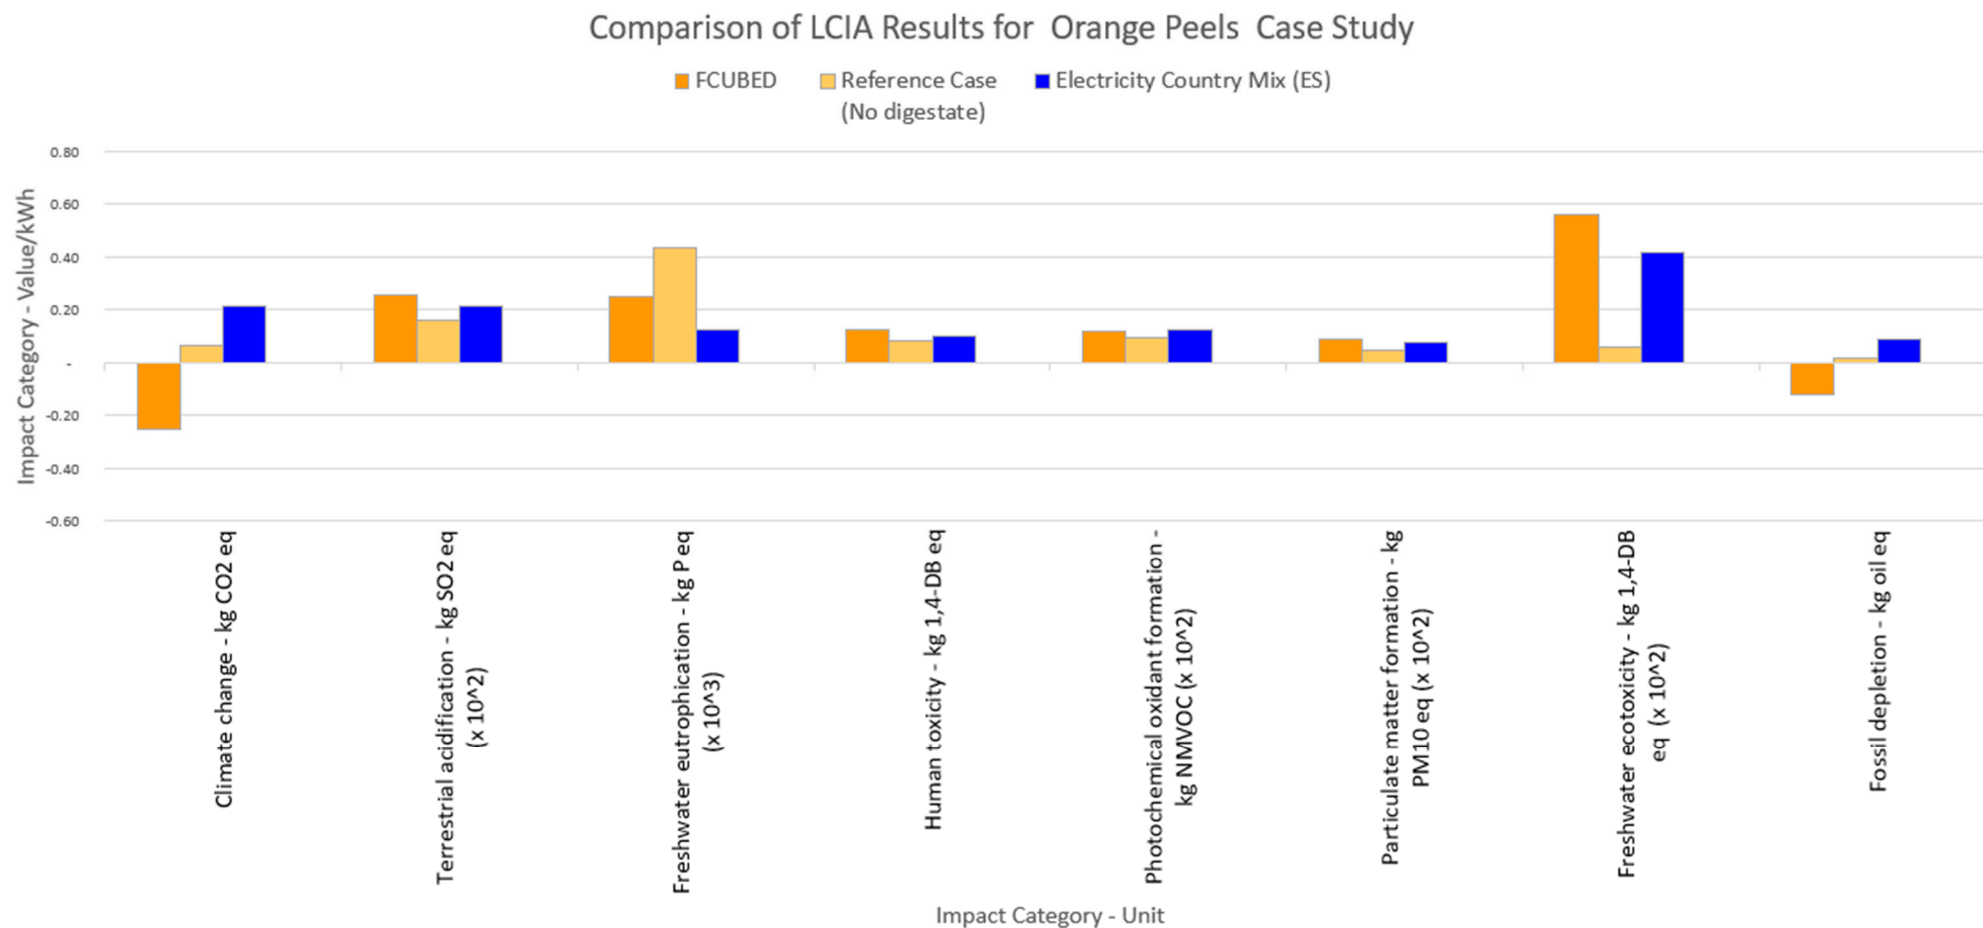

**Figure S12.** Comparison of LCIA results for orange peel case studies: F-CUBED production system, reference case, electricity country mix (Italy).
